# Supplementary material for: Characterization of Toxin Complex Gene Clusters and Insect Toxicity of Bacteria Representing Four Subgroups of Pseudomonas fluorescens
Source: PubMed Central journal article supplement (PMC5006985; doi:10.1371/journal.pone.0161120), 2016-08-31

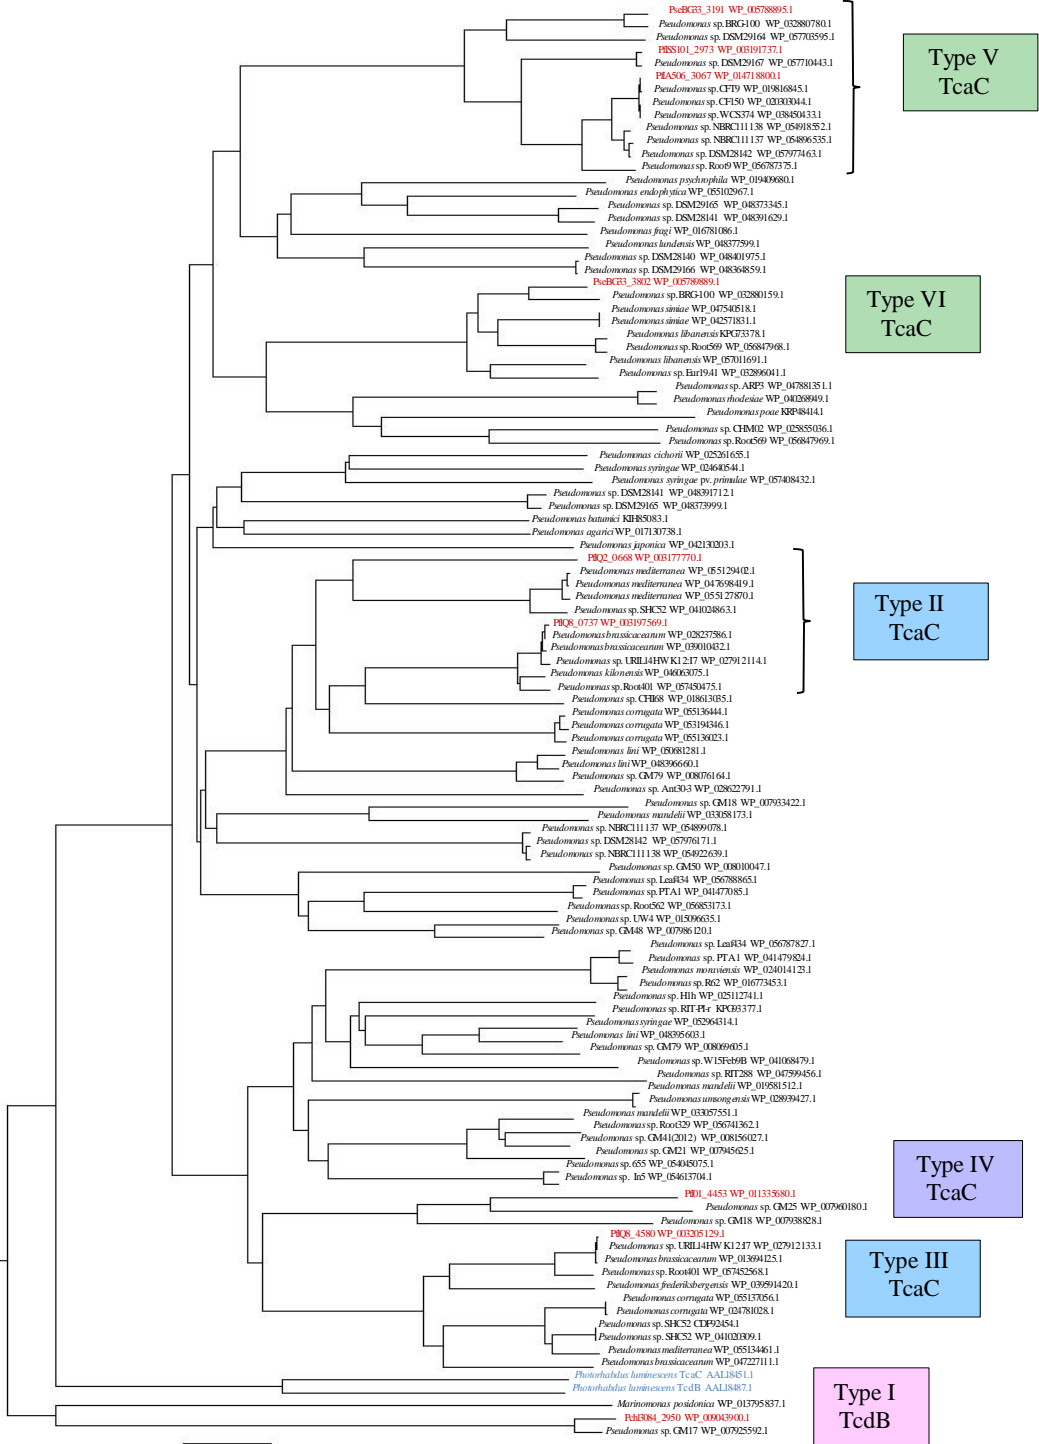

Supplement: pone.0161120.s002.pdf [file pone.0161120.s002.pdf]
